# Supplementary material for: The deregulation of miR-17/CCND1 axis during neuroendocrine transdifferentiation of LNCaP prostate cancer cells
Source: PubMed Central journal article supplement (PMC6042731; doi:10.1371/journal.pone.0200472), 2018-07-12
Supplement: pone.0200472.s006.pdf [file pone.0200472.s006.pdf]

**S1 Table: Primer sequences****RT-PCR**

---

|                |                                 |
|----------------|---------------------------------|
| AR-for         | 5'-cctggctccgcaacttacac-3'      |
| AR-rev         | 5'-ggacttgatgcatgcggtactc-3'    |
| Beta-actin-for | 5'-gctcgtcgtcgacaacggctc-3'     |
| Beta-actin-rev | 5'-caaacatgatctgggtcatcttctc-3' |
| GAPDH-for      | 5'-gatttggtcgtattggg-3'         |
| GAPDH-rev      | 5'-tccacgacgtactcagc-3'         |
| NSE-for        | 5'-tctgcagtcccagatcccagc-3'     |
| NSE-rev        | 5'-ctgatgagggtggcgcat-3'        |
| NTS-for        | 5'-catgctactcctggcttcagct-3'    |
| NTS-rev        | 5'-actcccagttgaaaagccct-3'      |
| PSA-for        | 5'-tccaatgacgtgtgtgcgca-3'      |
| PSA-rev        | 5'-gtgtacaggaaggccttc-3'        |
| TUBB3-for      | 5'-ctcgagccattctggtggacc-3'     |
| TUBB3-rev      | 5'-gatgctgtagagcgctcgtt-3'      |

---

**qRT-PCR**

|               |                               |
|---------------|-------------------------------|
| ADAM7-for     | 5'-cagtgcaatgaaaatcctgtg-3'   |
| ADAM7-rev     | 5'-tacaggtgcctgtccttct-3'     |
| CCND1-for     | 5'-gctgtgcatctacacccgaca-3'   |
| CCND1-rev     | 5'-ttgagcttgtcaccaggag-3'     |
| CNKSR2-for    | 5'-tggcgtgaagtattcaag-3'      |
| CNKSR2-rev    | 5'-actcgggtcctctcgtagt-3'     |
| CPEB1-for     | 5'-agagcagcacactcggtta-3'     |
| CPEB1-rev     | 5'-agaggcaggaagctcaagg-3'     |
| KCNN2-for     | 5'-gcctatcagtctctccacga-3'    |
| KCNN2-rev     | 5'-ctgctccattgtccacca-3'      |
| KLK2-for      | 5'-ctgcccattgcctaaagaag-3'    |
| KLK2-rev      | 5'-accctctggcctgtgtctt-3'     |
| KRT34-for     | 5'-ggagagtgaggactgcaagc-3'    |
| KRT34-rev     | 5'-ccacaggagtgcactagc-3'      |
| TGM2-for      | 5'-ggaccaagtacctgctca-3'      |
| TGM2-rev      | 5'-agaggatgcaaagaggaacg-3'    |
| TGFB2-for     | 5'-ccttctcccctccgaaac-3'      |
| TGFB2-rev     | 5'-agagcacctgggactgtctg-3'    |
| miR-17-for    | 5'-caaagtgcttacagtgcaggtag-3' |
| miR-20a-for   | 5'-taaagtgcttatagtgcaggtag-3' |
| miR-20b-for   | 5'-caaagtgctcatagtgcaggtag-3' |
| miR-93-for    | 5'-caaagtgctgtcgtgcaggtag-3'  |
| miR-106a-for  | 5'-aaaagtgcttacagtgcaggtag-3' |
| miR-106b-for  | 5'-taaagtgctgacagtgcagat-3'   |
| miR-126-for   | 5'-tcgtaccgtgagtaataatgcg-3'  |
| miR-141-for   | 5'-taacactgtctgtaaagatgg-3'   |
| miR-148a-for  | 5'-tcagtgcactacagaactttgt-3'  |
| miR-203-for   | 5'-gtgaaatgttaggaccactag-3'   |
| miR-720-for   | 5'-tctcgtggggcctcca-3'        |
| miR-1280      | 5'-tcccaccgctgccacc-3'        |
| miR-3135b-for | 5'-ggctggagcagtgagtggtg-3'    |
| miR-3178      | 5'-ggggcgcgccgcatcg-3'        |

**cloning primers**


---

|                    |                                              |
|--------------------|----------------------------------------------|
| CCND1-for-BcuI     | 5'- <u>ggactagt</u> ctgctggtttctacccaacg-3'  |
| CCND1-rev-SacI     | 5'- <u>cgagctc</u> gccaaccgtgcctggaagtc-3'   |
| miR-17-for-BamHI   | 5'- <u>cgggatcc</u> agagccaccacttccagtc-3'   |
| miR-17-rev-BglII   | 5'- <u>cgagatct</u> actcaacatcagcaggccct-3'  |
| miR-20a-for-EcoRI  | 5'- <u>cggaattc</u> gcaaaactgatggtgcct-3'    |
| miR-20a-rev-BamHI  | 5'- <u>cgggatcccc</u> acagtcagtttgcag-3'     |
| miR-20b-for-EcoRI  | 5'- <u>cggaattc</u> ctaaatgcccttctggcacag-3' |
| miR-20b-rev-BamHI  | 5'- <u>cgggatcct</u> gcatggattgcacagcca-3'   |
| miR-106a-for-EcoRI | 5'- <u>cggaattc</u> gcttagactctgtaagcca-3'   |
| miR-106a-rev-BamHI | 5'- <u>cgggatcct</u> acgctgaaatgcaaaccgt-3'  |
| miR-106b-for-EcoRI | 5'- <u>cggaattc</u> ggtaagtgcccaaattgct-3'   |
| miR-106b-for-BamHI | 5'- <u>cgggatcc</u> agcacaggatctaggacaca-3'  |
| miR-93-for-EcoRI   | 5'- <u>cggaattc</u> gggtagctcctaccgtgc-3'    |
| miR-93-rev-BamHI   | 5'- <u>cgggatcca</u> caggagtggaatccccct-3'   |

---

**site directed mutagenesis**

|               |                                            |
|---------------|--------------------------------------------|
| CCND1-mut-for | 5'-ccattccatttcaaCGTCGACcagtccaataggtgt-3' |
| CCND1-mut-rev | 5'-acacctattggactgGTCGACGttggaatggaatgg-3' |
